# Supplementary material for: An all-in-one aPAN/MXene@Ag–Ag2S nanofibrous aerogel for efficient oil/water separation, solar interfacial evaporation and photocatalytic degradation of high-concentration dyes
Source: Royal Society of Chemistry journal article supplement (doi:10.1039/d4ta03566f), 2024-01-01
Supplement: d4ta03566f4.pdf [file d4ta03566f4.pdf]

## Supporting Information

### **All-in-One aPAN/MXene@Ag-Ag<sub>2</sub>S Nanofibrous Aerogel for Efficient Oil/Water separation, Solar Interfacial Evaporation and Photocatalytic Degradation of High-concentration Dyes**

Busaremu Wulayimujiang #, Fang Guo #, Qianyu Ma, Yong Wen, Yang Yang,

Hongyan Huang, Quanpei Xie, Meng Shen, Jinxin Liu\*, Si Cheng\*

National Engineering Laboratory for Modern Silk, College of Textile and Clothing  
Engineering, Soochow University, Suzhou 215123, P. R. China.

---

E-mail addresses: [chengsi@suda.edu.cn](mailto:chengsi@suda.edu.cn) (S. Cheng), [jxliu@suda.edu.cn](mailto:jxliu@suda.edu.cn) (J. Liu).

**This supporting information contains the following contents:**

**Fig. S1.** (a) Digital photo of MXene@Ag-Ag<sub>2</sub>S aerogel. (b) Digital photo and mechanical properties of aPAN/MXene@Ag-Ag<sub>2</sub>S aerogel.

**Fig. S2.** (a) SEM of pristine multi-layer Ti<sub>3</sub>C<sub>2</sub>T<sub>x</sub>. (b) Digital photographs of MXene@Ag-Ag<sub>2</sub>S colloidal solution with different concentrations (10 mg/mL and 0.01 mg/mL). (c) EDS element analysis of MXene@Ag-Ag<sub>2</sub>S. (d) UV-vis-NIR absorption spectra of different aqueous solutions (10 mg/mL).

**Fig. S3.** XPS spectra of MXene@Ag-Ag<sub>2</sub>S.

**Fig. S4.** (a) The UV-vis absorption spectra of aPAN/MXene@Ag-Ag<sub>2</sub>S aerogels for absorption of MB solutions with the concentration of 10 mg/L under dark condition. (b-c) The UV-vis absorption curve of 10 mg/L MB solution of aPAN/MXene (b) and aPAN/MXene@Ag (c), respectively.

**Fig. S5.** (a) The UV-vis absorption spectra of aPAN/MXene@Ag-Ag<sub>2</sub>S aerogels for photocatalytic degradation of MB solutions with the concentration of 100 mg/L. (b) Photodegradation of MB (100 mg/L) for eight cycles using aPAN/MXene@Ag-Ag<sub>2</sub>S aerogel. (c, d) The UV-vis absorption curve of aPAN/MXene aerogel of RhB and R6G (10 mg/L), respective.

**Fig. S6.** (a, b) Solar optical power density curve during photodegradation of dyed oil/water emulsion and dyeing effluents, respectively. (c) UV-vis spectra and corresponding photos of the feed river before and after filtration.

**Table S1.** The comparison of photodegradation rate towards the MB pollutants of catalysts with those of the counterparts reported in the literatures.

**Table S2.** Content characteristics of COD and NH<sub>3</sub>-N in wastewater before and after degradation.

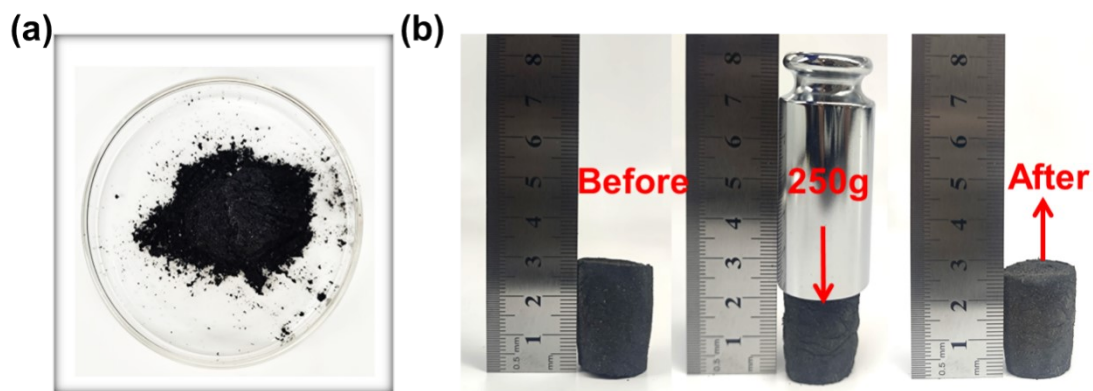

**Fig. S1.** (a) Digital photo of MXene@Ag-Ag<sub>2</sub>S aerogel. (b) Digital photo and mechanical properties of aPAN/MXene@Ag-Ag<sub>2</sub>S aerogel.

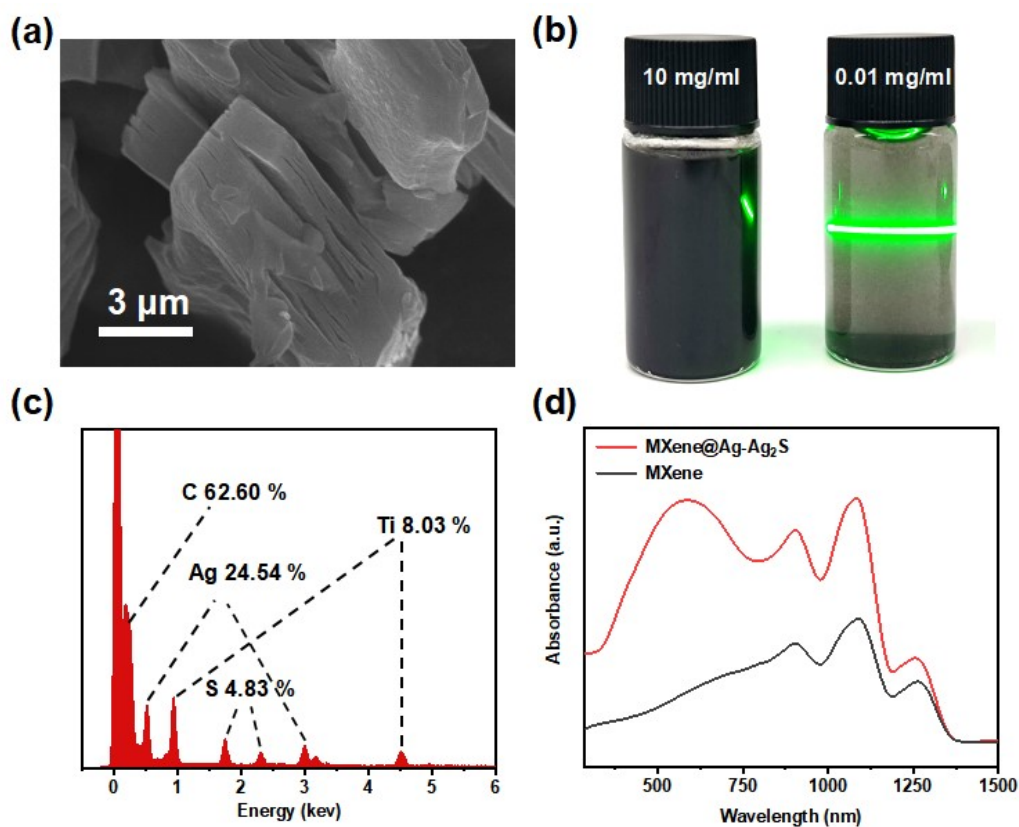

**Fig. S2.** (a) SEM of pristine multi-layer Ti<sub>3</sub>C<sub>2</sub>T<sub>x</sub>. (b) Digital photographs of MXene@Ag-Ag<sub>2</sub>S colloidal solution with different concentrations (10 mg/mL and 0.01 mg/mL). (c) EDS element analysis of MXene@Ag-Ag<sub>2</sub>S. (d) UV-vis-NIR absorption spectra of different aqueous solutions (10 mg/mL).

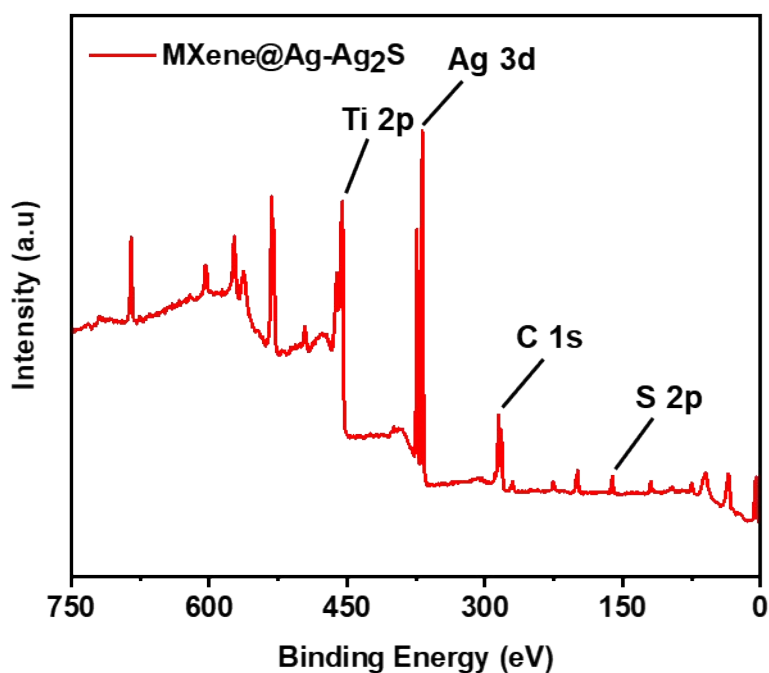

**Fig. S3.** XPS spectra of MXene@Ag-Ag<sub>2</sub>S.

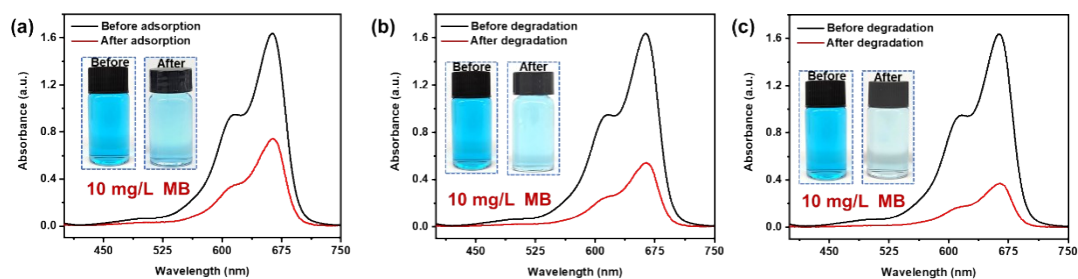

**Fig. S4.** (a) The UV-vis absorption spectra of aPAN/MXene@Ag-Ag<sub>2</sub>S aerogels for absorption of MB solutions with the concentration of 10 mg/L under dark condition. (b-c) The UV-vis absorption curve of 10 mg/L MB solution of aPAN/MXene (b) and aPAN/MXene@Ag (c), respectively.

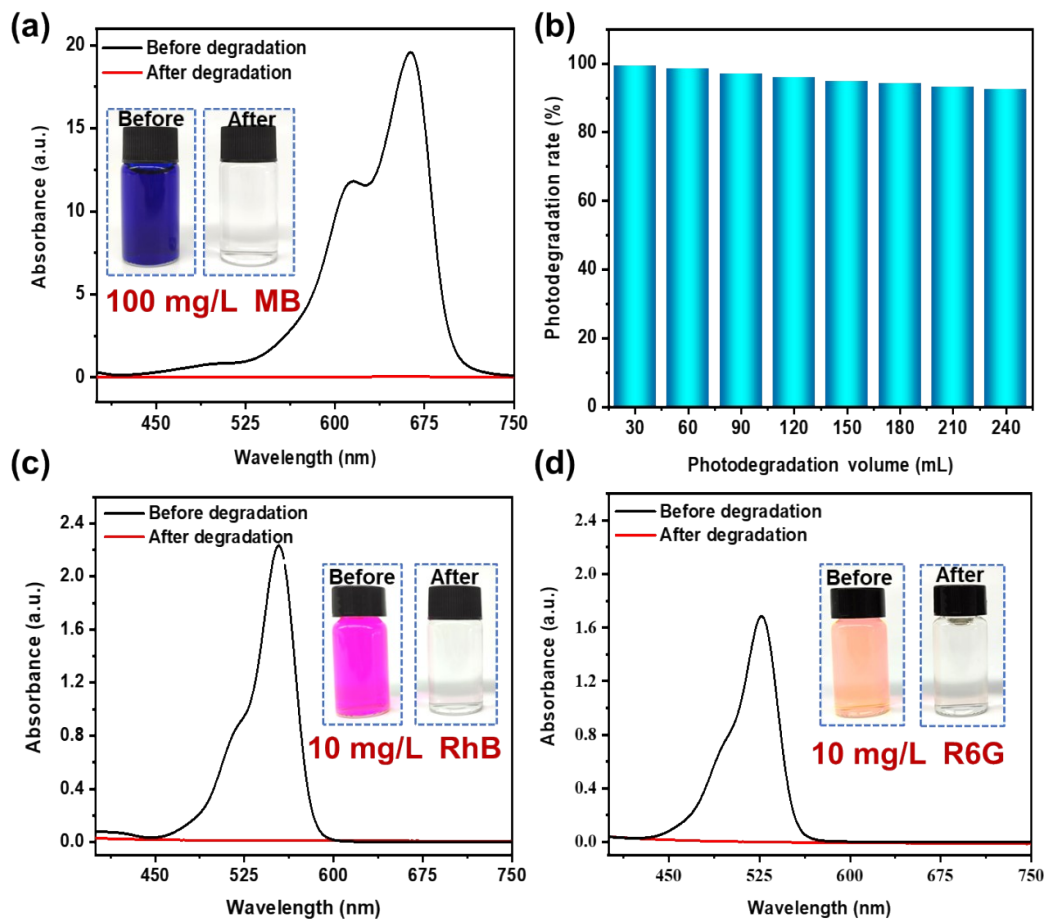

**Fig. S5.** (a) The UV-vis absorption spectra of aPAN/MXene@Ag-Ag<sub>2</sub>S aerogels for photocatalytic degradation of MB solutions with the concentration of 100 mg/L. (b) Photodegradation of MB (100 mg/L) for eight cycles using aPAN/MXene@Ag-Ag<sub>2</sub>S aerogel. (c, d) The UV-vis absorption curve of aPAN/MXene aerogel of RhB and R6G (10 mg/L), respective.

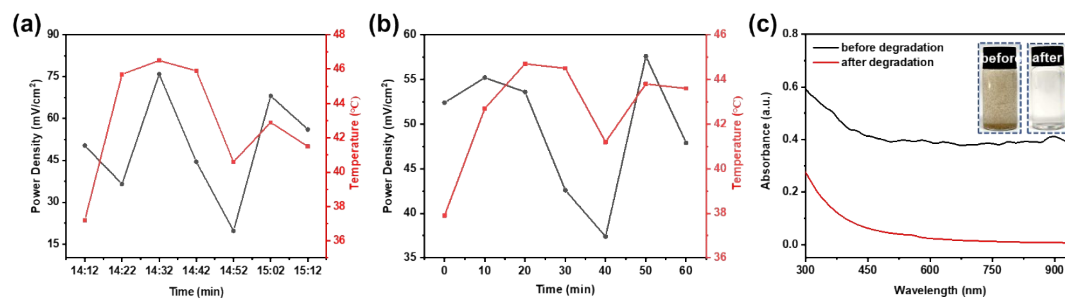

**Fig. S6.** (a, b) Solar optical power density curve during photodegradation of dyed oil/water emulsion and dyeing effluents, respectively. (c) UV-vis spectra and corresponding photos of the feed river before and after filtration.

**Table S1.** The comparison of photodegradation rate towards the MB pollutants of catalysts with those of the counterparts reported in the literature.

| Materials                                                         | Decomposed dye | Dye concentration (mg/L) | Process scale (ml) | Degradation rate (%) | Ref.               |
|-------------------------------------------------------------------|----------------|--------------------------|--------------------|----------------------|--------------------|
| aPAN/MXene@Ag-Ag <sub>2</sub> S                                   | MB             | 100                      | 240                | 99.99                | This work          |
| Ti <sub>3</sub> C <sub>2</sub> Tx/Vit.C(TMAOH)                    | MB             | 25                       | 1                  | 100                  | Ref. <sup>1</sup>  |
| MF-MXene/ppy                                                      | MB             | 10                       | 70                 | 92.38                | Ref. <sup>2</sup>  |
| MXene@TiO <sub>2</sub> /PEN                                       | MB             | 20                       | 50                 | 92.31                | Ref. <sup>3</sup>  |
| KH570/TiO <sub>2</sub> /MXene/PAN                                 | MB             | 20                       | 50                 | 90                   | Ref. <sup>4</sup>  |
| ML-Ti <sub>3</sub> C <sub>2</sub> (OH) <sub>2</sub>               | MB             | 10                       | 100                | 81.2                 | Ref. <sup>5</sup>  |
| TiO <sub>2</sub> /MXene                                           | MB             | 20                       | 60                 | 96.44                | Ref. <sup>6</sup>  |
| Bi <sub>2</sub> WO <sub>6</sub> /Nb <sub>2</sub> CTx              | MB             | 15                       | 100                | 92.7                 | Ref. <sup>7</sup>  |
| Ti <sub>3</sub> C <sub>2</sub> MXene/NH <sub>2</sub> -MIL-88B(Fe) | MB             | 50                       | 100                | ~80                  | Ref. <sup>8</sup>  |
| Ti <sub>3</sub> C <sub>2</sub> Tx                                 | MB             | 20                       | 100                | >90                  | Ref. <sup>9</sup>  |
| ZnO@Ti <sub>3</sub> C <sub>2</sub>                                | MB             | 20                       | 20                 | 94.84                | Ref. <sup>10</sup> |
| C/TiO <sub>2</sub> @TiOF <sub>2</sub>                             | MB             | 20                       | 100                | 95                   | Ref. <sup>11</sup> |
| AgNPs/TiO <sub>2</sub> /Ti <sub>3</sub> C <sub>2</sub> Tx         | MB             | 10                       | 100                | 99                   | Ref. <sup>12</sup> |
| ZnO/V <sub>2</sub> C MXene                                        | MB             | 10                       | 7.998              | 98.9                 | Ref. <sup>13</sup> |
| CdS@Ti <sub>3</sub> C <sub>2</sub> @TiO <sub>2</sub>              | MB             | 20                       | 200                | 100                  | Ref. <sup>14</sup> |
| Ti <sub>3</sub> C <sub>2</sub> /Bi <sub>2</sub> O <sub>3</sub>    | MB/BA          | 6                        | 500                | 80                   | Ref. <sup>15</sup> |

**Table S2.** Content characteristics of COD and NH<sub>3</sub>-N in wastewater before and after degradation.

---

**Qing Ke wastewater S2023101815-W001 (DB32/4440-2022)**

---

| Main components in wastewater | Discharge Standard | Before degradation   | After degradation |
|-------------------------------|--------------------|----------------------|-------------------|
| COD (mg/L)                    | 30                 | 3.28×10 <sup>3</sup> | 14                |
| NH <sub>3</sub> -N (mg/L)     | 1.5                | 16.2                 | 0.565             |

---



## References

- 1 D. Bury, M. Jakubczak, M. A. K. Purbayanto, A. Wojciechowska, D. Moszczyńska and A. M. Jastrzębska, *Small Methods*, 2023, 2201252.
- 2 X. Mu, L. Chen, N. Qu, J. Yu, X. Jiang, C. Xiao, X. Luo and Q. Hasi, *J Colloid Interf Sci*, 2023, **636**, 291–304.
- 3 Q. Feng, Y. Zhan, W. Yang, A. Sun, H. Dong, Y.-H. Chiao, Y. Liu, X. Chen and Y. Chen, *J Colloid Interf Sci*, 2022, **612**, 156–170.
- 4 X. Qin, X. Feng, T. Zhu, L. Ji and A. Zhu, *J Solid State Chem*, 2022, **312**, 123142.
- 5 J. Qu, D. Teng, X. Zhang, Q. Yang, P. Li and Y. Cao, *Ceram Int*, 2022, **48**, 14451–14459.
- 6 X. Geng, Y. Liu, W. Xu, X. Huang, P. Wang, M. Zhang, G. Wen and W. Wang, *Ceramics International*, 2022, **48**, 20146–20157.
- 7 C. Cui, R. Guo, H. Xiao, E. Ren, Q. Song, C. Xiang, X. Lai, J. Lan and S. Jiang, *Appl Surf Sci*, 2020, **505**, 144595.
- 8 R. Long, Z. Yu, Q. Tan, X. Feng, X. Zhu, X. Li and P. Wang, *Appl Surf Sci*, 2021, **570**, 151244.
- 9 O. Mashtalir, K. M. Cook, V. N. Mochalin, M. Crowe, M. W. Barsoum and Y. Gogotsi, *J. Mater. Chem. A*, 2014, **2**, 14334–14338.
- 10 M. Liu, J. Li, R. Bian, X. Wang, Y. Ji, X. Zhang, J. Tian, F. Shi and H. Cui, *J Alloy Compd*, 2022, **905**, 164025.
- 11 T. Liu, L. Li, X. Geng, C. Yang, X. Zhang, X. Lin, P. Lv, Y. Mu and S. Huang, *Journal of Alloys and Compounds*, 2022, **919**, 165629.
- 12 Z. Othman, A. Sinopoli, H. R. Mackey and K. A. Mahmoud, *Acs Omega*, 2021, **6**, 33325–33338.

- 13 W. Zhou, B. Yu, J. Zhu, K. Li and S. Tian, *New J Chem*, 2022, **46**, 14793–14804.
- 14 Q. Liu, X. Tan, S. Wang, F. Ma, H. Znad, Z. Shen, L. Liu and S. Liu, *Environ Sci-nano*, 2019, **6**, 3158–3169.
- 15 S. Munir, M. M. Baig, S. Zulfiqar, M. S. Saif, P. O. Agboola, M. F. Warsi and I. Shakir, *Ceram Int*, 2022, **48**, 21676–21689.
